# Supplementary material for: DNA Repair Biomarker Profiling of Head and Neck Cancer: Ku80 Expression Predicts Locoregional Failure and Death following Radiotherapy
Source: Oxford University Press journal article supplement (doi:10.1158/1078-0432.ccr-10-2641), 2011-02-24
Supplement: 10780432ccr102641-sup-supplementary_data.pdf [file 10780432ccr102641-sup-supplementary_data.pdf]

### Supplementary Figure 1

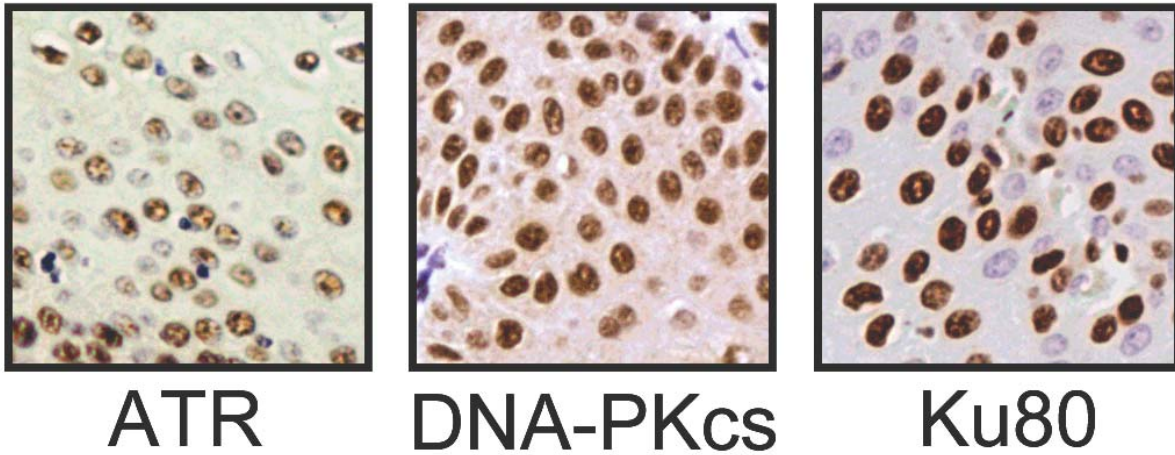

**Supplementary Figure 1.** Sample photomicrographs of representative tumor sections stained with three DSB repair biomarkers, showing the patterns of nuclear localization expected for each.

**Supplementary Table 1**

| <b>Biomarker</b>   | <b>Pathway</b> | <b>Antibody</b>       | <b>Dilution</b> |
|--------------------|----------------|-----------------------|-----------------|
| <b>ATM</b>         | HR             | AbCam: ab32420        | 1:100           |
| <b>ATR</b>         | HR             | Cell Signaling: 2790S | 1:100           |
| <b>Mre11</b>       | HR             | Cell Signaling: 4847  | 1:500           |
| <b>Nbs1</b>        | HR             | Novus: NBP1-06609     | 1:100           |
| <b>Rad50</b>       | HR             | AbCam: ab89           | 1:400           |
| <b>FANCC</b>       | HR             | Novus: NBP1-03280     | 1:500           |
| <b>FANCD2</b>      | HR             | Novus: NBP1-18976SS   | 1:200           |
| <b>TP53BP1</b>     | HR             | Cell Signaling: 4937  | 1:100           |
| <b>TP53BP2</b>     | HR             | Novus: NB110-40638    | 1:100           |
| <b>BRCA1</b>       | HR             | Novus: NB100-77325    | 1:100           |
| <b>BRCA2</b>       | HR             | Novus: NB100-65084    | 1:50            |
| <b>Rad51</b>       | HR             | Novus: H00005888-B01  | 1:100           |
| <b>TOPBP1</b>      | HR             | AbCam: ab2402         | 1:100           |
| <b>ATRIP</b>       | HR             | Cell Signaling: 2737S | 1:100           |
| <b>ATRX</b>        | HR             | Novus: NB100-60685    | 1:100           |
| <b>Ku80</b>        | NHEJ           | Cell Signaling: 2180S | 1:800           |
| <b>DNA-PKcs</b>    | NHEJ           | AbCam: ab32566        | 1:25            |
| <b>Artemis</b>     | NHEJ           | AbCam: ab35649        | 1:100           |
| <b>p16</b>         | CC             | CINtec: 9517          | 1:3             |
| <b>p21</b>         | CC             | Novocastra: WAF-1     | 1:25            |
| <b>p53</b>         | CC             | Dako: M7001           | 1:100           |
| <b>Rb</b>          | CC             | Calbiochem: OP66      | 1:30            |
| <b>Src</b>         | CC             | Cell Signaling: 2109  | 1:800           |
| <b>β catenin</b>   | EMT            | BD: 610154            | 1:500           |
| <b>E-cadherin</b>  | EMT            | Zymed: 13-1700        | 1:100           |
| <b>Notch1</b>      | EMT            | Cell Signaling: 3608S | 1:100           |
| <b>Shh</b>         | EMT            | AbCam: ab53281        | 1:100           |
| <b>Vimentin</b>    | EMT            | Dako: M0725           | 1:900           |
| <b>Twist</b>       | EMT            | AbCam: ab50581        | 1:500           |
| <b>Osteopontin</b> | Hypoxia        | AbCam: ab8448         | 1:500           |
| <b>PDGFB</b>       | Hypoxia        | Santa Cruz: SC-7878   | 1:10            |
| <b>VEGF</b>        | Hypoxia        | Santa Cruz: SC-152    | 1:50            |
| <b>EGFR</b>        | CSR            | Invitrogen: 31G7      | 1:50            |
| <b>IGFR-1β</b>     | CSR            | Cell Signaling: 3027  | 1:150           |
| <b>PTEN</b>        | Survival       | Dako: M03627          | 1:100           |
| <b>Survivin</b>    | Survival       | Cell Signaling: 2808  | 1:400           |
| <b>ERCC1</b>       | NER            | AbCam: ab2356         | 1:100           |
| <b>HPV (ISH)</b>   | -              | Ventana: 800-4295     | -               |

**Supplementary Table 1.** Antibodies used for biomarker profiling. Vendors and catalog numbers are provided, along with the antibody dilutions used for staining and the canonical pathways represented by each marker. Pathways: CC – cell cycle, CSR – cell surface receptor, EMT epithelial-mesenchymal transition, HR – homologous recombination, NER – nucleotide excision repair, NHEJ – non-homologous end joining.

**Supplementary Table 2**

| Score  | Intensity | Percent Positive |
|--------|-----------|------------------|
| Low    | 0, 1+     | 0-100%           |
|        | 2+        | 5-50%            |
| Medium | 2+        | 55-70%           |
|        | 3+        | 5-50%            |
| High   | 2+        | 75-100%          |
|        | 3+        | 55-100%          |

**Supplementary Table 2.** A summary of the algorithm used to convert IHC staining parameters into an overall expression score for each biomarker studied. Of note, HPV typing by in situ was not scored this way; it was scored as negative vs. positive, per clinical guidelines.

## Supplementary Figure 2

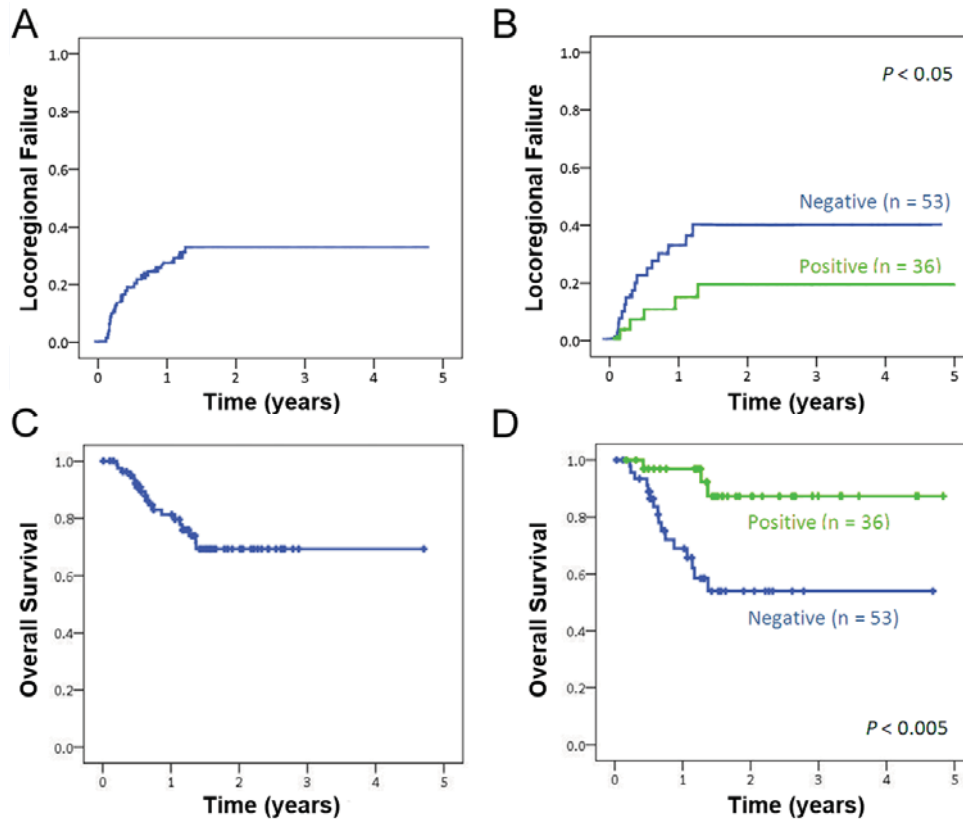

**Supplementary Figure 2.** Cumulative locoregional failure (A and B) and overall survival (C and D) rates for the entire cohort (A and C) as well as the patient subsets stratified by tumor HPV status (B and D).

### Supplementary Figure 3

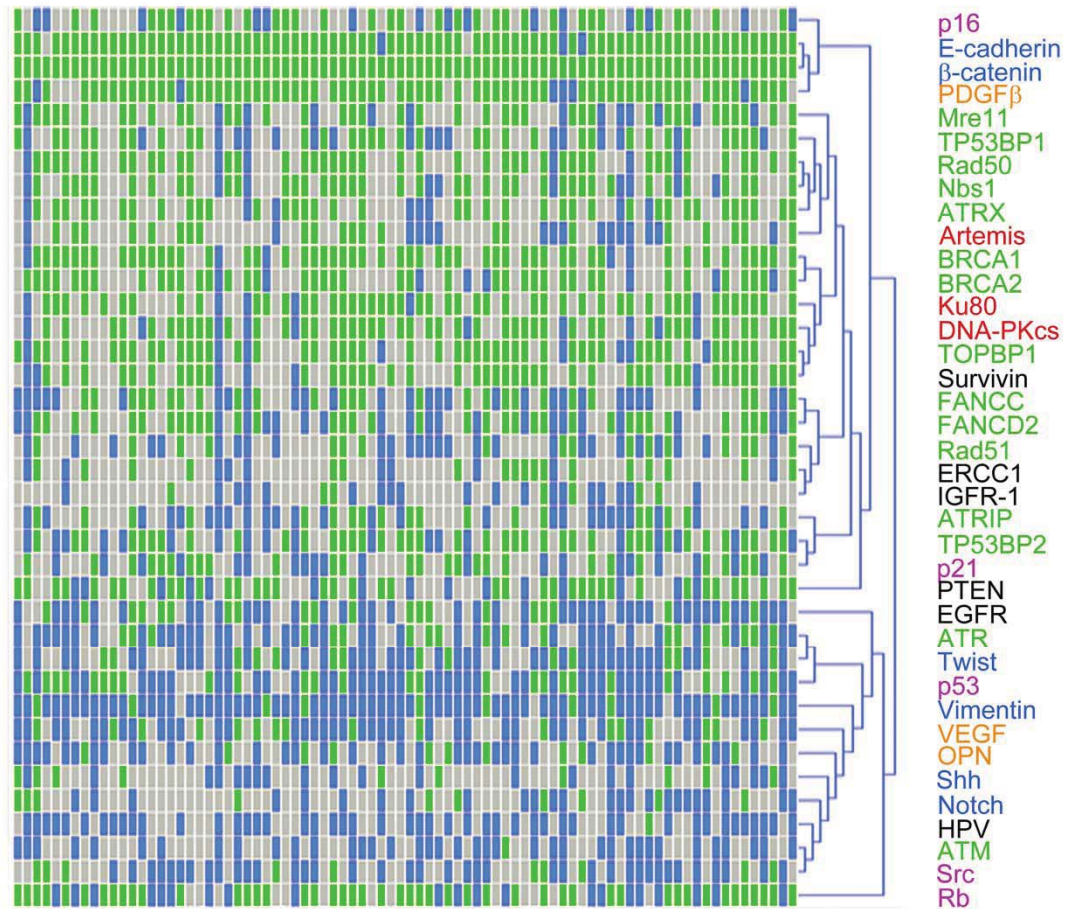

**Supplementary Figure 3.** A heatmap is shown representing an unsupervised hierarchical clustering of the biomarker set. Biomarker names are colored according to their functional classification: non-homologous end joining (red), homologous recombination (green), cell cycle (purple), epithelial/mesenchymal transition (blue), and hypoxia (orange).

**Supplementary Table 3**

| Endpoint   | Biomarker   | Spearman's rho Coefficient | Univariate <i>P</i> value | Multivariate <i>P</i> value |
|------------|-------------|----------------------------|---------------------------|-----------------------------|
| <b>LRC</b> | <b>Ku80</b> | 0.497                      | <0.005                    | <b>0.05</b>                 |
|            | DNA-PKcs    | 0.395                      | 0.008                     | NS                          |
| <b>OS</b>  | <b>Ku80</b> | 0.503                      | <0.005                    | <b>0.02</b>                 |
|            | Shh         | 0.368                      | 0.01                      | NS                          |
|            | BRCA1       | 0.36                       | 0.02                      | NS                          |
|            | DNA-PKcs    | 0.357                      | 0.02                      | NS                          |

**Supplementary Table 3.** Linear univariate and multivariate modeling of locoregional control (LRC) and overall survival (OS) probabilities as a function of clinical and biomarker covariates for the HPV-negative subset of the testing cohort. Positive correlations imply a larger risk of failure for increasing expression values. NS = not significant ( $P > 0.05$ ).

**Supplementary Table 4**

| <b>Endpoint</b> | <b>Biomarker</b>  | <b>Spearman's rho<br/>Coefficient</b> | <b>Univariate<br/><i>P</i> value</b> | <b>Multivariate<br/><i>P</i> value</b> |
|-----------------|-------------------|---------------------------------------|--------------------------------------|----------------------------------------|
| <b>LRC</b>      | Ku80              | 0.450                                 | 0.007                                | NS                                     |
|                 | <b>ATM</b>        | 0.432                                 | 0.01                                 | <b>0.03</b>                            |
|                 | p53               | 0.376                                 | 0.03                                 | NS                                     |
|                 | <b>ATR</b>        | 0.370                                 | 0.01                                 | <b>0.03</b>                            |
|                 | <b>E-cadherin</b> | - 0.342                               | 0.02                                 | <b>0.04</b>                            |
| <b>OS</b>       | <b>VEGF</b>       | 0.373                                 | 0.02                                 | <b>0.04</b>                            |
|                 | Ku80              | 0.361                                 | 0.04                                 | NS                                     |

**Supplementary Table 4.** Linear univariate and multivariate modeling of locoregional control (LRC) and overall survival (OS) probabilities as a function of clinical and biomarker covariates for the HPV-positive subset of the testing cohort. Positive correlations imply a larger risk of failure for increasing expression values. NS = not significant ( $P > 0.05$ ).
